# Supplementary material for: Spent coffee ground–calcium alginate biosorbent for adsorptive removal of methylene blue from aqueous solutions
Source: Royal Society of Chemistry journal article supplement (doi:10.1039/d3su00365e), 2023-12-11
Supplement: d3su00365e1.pdf [file d3su00365e1.pdf]

## Supporting information

### Spent coffee ground-calcium alginate biosorbent for adsorptive removal of methylene blue from aqueous solutions

Catalina V. Flores<sup>a,b,+</sup>, Juan L. Obeso<sup>a,b,+</sup>, Herlys Viltres<sup>c</sup>, Enelio Torres-García<sup>e</sup>, Amin Reza  
Rajabzadeh<sup>c</sup>, Seshasai Srinivasan<sup>c</sup>, Ricardo A. Peralta<sup>d\*</sup>,

Ilich A. Ibarra<sup>b\*</sup>, and Carolina Leyva<sup>a\*</sup>

*<sup>a</sup>Instituto Politécnico Nacional, CICATA U. Legaria, Laboratorio Nacional de Ciencia,  
Tecnología y Gestión Integrada del Agua (LNAgua), Legaria 694, Col. Irrigación, Miguel  
Hidalgo, 11500, CDMX, México*

*<sup>b</sup>Laboratorio de Físicoquímica y Reactividad de Superficies (LaFREs), Instituto de  
Investigaciones en Materiales, Universidad Nacional Autónoma de México, Circuito Exterior  
s/n, CU, Coyoacán, 04510, Ciudad de México, México.*

*<sup>c</sup>School of Engineering Practice and Technology, McMaster University, 1280 Main Street West  
Hamilton, ON, L8S 4L8, Canada;*

*<sup>d</sup>Departamento de Química, División de Ciencias Básicas e Ingeniería. Universidad Autónoma  
Metropolitana (UAM-I), 09340, México.*

*<sup>e</sup>Instituto Mexicano del Petróleo, Eje Central Lázaro Cárdenas Norte, # 152, 07730 Mexico City,  
Mexico.*

*<sup>+</sup>These authors contributed equally to this work.*

## Section S1: Analytical instruments

Fourier-transform infrared spectroscopy (FT-IR) spectra were obtained in the range of 4000-400  $\text{cm}^{-1}$  on a Shimadzu IRTracer-100 spectrometer using KBr pellets. Thermal gravimetric analysis (TGA) was performed using a TA Instruments Q500HR analyzer under an  $\text{N}_2$  atmosphere using the high-resolution mode (dynamic rate TGA) at a  $2\text{ }^\circ\text{C min}^{-1}$  scan rate from room temperature to  $800\text{ }^\circ\text{C}$ . The zeta potentials were measured using NanoPlus HD sizer equipment (Micrometrics, USA). Zeta potential values for the final composites were measured in a 2-9 pH range. A minimum of 3 measurements per sample was done at room temperature. The pH variation was carried out using 0.01 M NaOH and  $\text{HNO}_3$  solutions. X-ray photoelectron Spectroscopy (XPS) analyses were carried out with a Thermo Scientific K-alpha X-ray photoelectron spectrometer working at 72 W and equipped with a hemispherical analyzer and a monochromatic. Survey scans were recorded using  $400\text{ }\mu\text{m}$  spot size and fixed pass energy of 200 eV, whereas high-resolution scans were collected at 20 eV of pass energy. Spectra have been charged and corrected to the mainline of the carbon 1s spectrum (adventitious carbon) set to 284.8 eV. Spectra were analyzed using CasaXPS software (version 2.3.14). Spectral backgrounds were subtracted using the Shirley method. Curve fitting procedures and elemental quantifications were performed with the CasaXPS program (version 2.3.14). MB concentration was determined by a GENESYS 150 UV-Vis spectrophotometer at the wavelength of 664 nm (Thermo Scientific, USA). The pH measurements were made using the Acorn® pH 5 Meter (OAKTON, USA). The morphology of SCG\_ALG was obtained employing a variable pressure scanning electron microscope (SEM), brand FEI Co. and Quanta model FEG 250 with an EDS detector Bruker model XFlash 6160. X-ray diffraction (XRD) analysis was performed using a D5000 type equipment, Siemens, Germany. Cu radiation was used the analyzed range of diffraction angle  $2\theta$  was between  $3$  and  $50^\circ$  with a step width of  $0.028^\circ$ .

Nitrogen adsorption-desorption isotherms were measured by a volumetric method using a Micromeritics ASAP 2020 gas sorption analyzer. The sample mass was 65.0 mg. Free space correction measurements were performed using ultra-high purity He gas (UHP grade 5, 99.999% pure). Nitrogen isotherms were measured using UHP grade Nitrogen. All nitrogen analyses were performed using a liquid nitrogen bath at 77 K. Oil-free vacuum pumps were used to prevent contamination of sample or feed gases.

## Section S2: Materials Characterization

**Table S1.** Zeta potential of spent coffee grounds (SCG), alginate beads (ALG), and spent coffee grounds encapsulated in alginate beads (SCG\_ALG).

| SCG   |                  | ALG  |                  | SCG_ALG |                  |
|-------|------------------|------|------------------|---------|------------------|
| pH    | $\zeta$ pot (mV) | pH   | $\zeta$ pot (mV) | pH      | $\zeta$ pot (mV) |
| 10.06 | -71.39           | 9.98 | -32.96           | 10.21   | -67.56           |
| 9.23  | -68.69           | 9.13 | -31.58           | 8.87    | -51.03           |
| 8.15  | -61.88           | 8.30 | -29.21           | 7.46    | -47.86           |
| 7.06  | -52.53           | 7.38 | -28.92           | 6.85    | -40.32           |
| 5.46  | -30.5            | 6.47 | -27.92           | 6.32    | -36.88           |
| 4.27  | -20.82           | 5.76 | -22.45           | 5.25    | -34.6            |
| 3.99  | -16.51           | 5.32 | -21.76           | 4.25    | -32.23           |
| 3.71  | -9.97            | 4.54 | -21.11           | 3.87    | -19.69           |
| 3.43  | -8.42            | 3.91 | -12.86           | 3.56    | -18.78           |
| 3.01  | -0.11            | 3.13 | -11.13           | 3.03    | -11.36           |
| 2.07  | 8.04             | 2.03 | -9.63            | 2.15    | -7.95            |

## Section S3: Experimental procedure

### *MB quantification*

The determination of the MB concentration was through the Lambert-Beer equation expressed as:

$$A = \varepsilon \cdot b \cdot C$$

Where  $A$  is the absorbance of the solution,  $b$  is the cell's longitude (cm),  $C$  is the dye concentration in the solution ( $\text{mg L}^{-1}$ ), and  $\varepsilon$  is the extinction coefficient ( $(\text{mg L}^{-1})^{-1} \text{cm}^{-1}$ ). A UV-vis scan from 200-900 nm was performed on the MB solution (**Figure S1a**), where the maximum absorptivity wavelength was determined at 664 nm, at which the experimental readings were performed. Moreover, a calibration curve from 0.1 to 10.0  $\text{mg L}^{-1}$  of MB was performed, which determined the molar absorptivity coefficient from the slope after linear fit (**Figure S1b**).

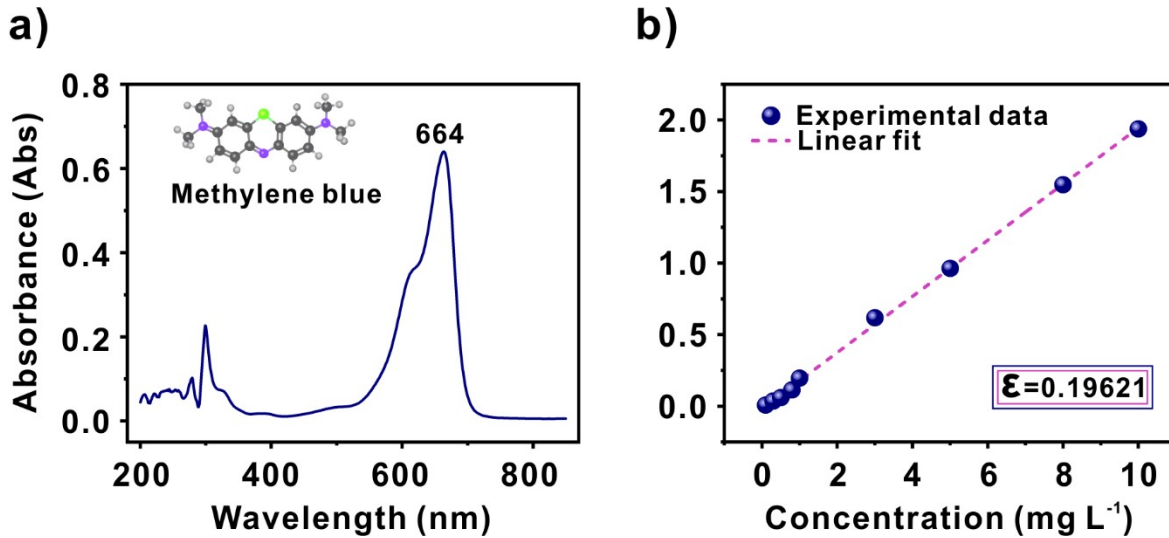

**Figure S1.** a) MB UV-vis scan absorption spectra; b) MB calibration curve.

The MB adsorption efficiency was determined through the concentration difference method. The following equation was used to estimate the percent uptake by the adsorbent.

$$\text{Removal efficiency (\%)} = \left( \frac{C_0 - C_e}{C_e} \right) \times 100$$

Where  $C_0$  ( $\text{mg L}^{-1}$ ) is the initial concentration, and  $C_e$  ( $\text{mg L}^{-1}$ ) is the concentration in the equilibrium. Adsorption capacity  $Q_e$  ( $\text{mg g}^{-1}$ ) was calculated by the following equation.

$$Q_e = \left( \frac{(C_0 - C_e) \times V}{m} \right)$$

Where  $V$  (L) is the volume of the solution, and  $m$  (g) is the adsorbent mass.

#### *Effect of adsorbent amount*

The effect of adsorbent mass over the adsorption process was evaluated by adding 5, 10, 20, 30, 40, and 50 mg of *SCG\_ALG* to 20 ml solution with 50 mg L<sup>-1</sup> of MB under stirring for 180 min.

#### *Influence of pH in the adsorption*

To study the effect of solution pH, adsorption experiments were carried out at pH 2, 4, 6, 8, and 10 by adding 10 mg of *SCG\_ALG* to 20 mL (50 mg L<sup>-1</sup>) of MB solution, under stirring for 180 min. The pH values were adjusted using 0.1 mol L<sup>-1</sup> HNO<sub>3</sub>/NaOH.

#### *Influence of contact time*

For evaluating the effect of contact time, 40 mg of *SCG\_ALG* were placed in 80 ml with 50 mg L<sup>-1</sup> of MB for 1440 min under stirring. 2 ml aliquots were collected during the experiment.

#### *Effect of initial concentration*

The variation of initial concentration of MB was valued at 10, 20, 40, 50, 80, 100, 300, 500, 800, and 1200 mg L<sup>-1</sup>. 10 mg of *SCG\_ALG* were added to 20 ml of MB solution under stirring for 180 min.

#### *Effect of temperature*

The effect of temperature over the adsorption process was carried out at 25, 40, 50, and 60 °C for 60 min by adding 10 mg of *SCG\_ALG* to 20 mL MB solution at 50 mg L<sup>-1</sup> under stirring.

#### *Regeneration studies*

The effect of regeneration was evaluated by 3 cycles with 20 mL of MB solution 50 mg L<sup>-1</sup> of concentration with 10 mg of *SCG\_ALG* under stirring for 180 min. For desorption, 20 ml of ethanol

were employed, and the exhausted *SCG\_ALG* were placed under stirring for 180 min for each desorption step.

*Well, lake and tap water studies*

The adsorption experiment of MB removal employing water from a natural source, such as tap, lake, and well water, was carried out to evaluate the performance of the adsorbent material in more real and practical applications. In these experiments, 10 mg of *SCG\_ALG* were added to 20 ml of MB solution at 50 mg L<sup>-1</sup> under stirring for 180 min.

**Table S2.** Water sources pH-values.

| <b>Water source</b> | <b>pH</b> |
|---------------------|-----------|
| Deionized water     | 5.15      |
| Well water          | 6.01      |
| Lake water          | 5.84      |
| Tap water           | 6.10      |

**Section S3: Kinetics models, isotherms models, thermodynamic parameters data modeling.**

**Table S3.** Langmuir adsorption capacities reported from other bioadsorbents.

| <b>Bioadsorbent</b> | <b>Q<sub>max</sub> (mg·g<sup>-1</sup>)</b> | <b>Reference</b> |
|---------------------|--------------------------------------------|------------------|
| Activated carbon    | 13.35                                      | 1                |
| Activated carbon    | 413                                        | 2                |
| Activated carbon    | 602.4                                      | 3                |
| Zeolite             | 45                                         | 4                |
| Zeolite             | 22                                         |                  |
| Peanut hull         | 161.3                                      | 5                |
| Pomelo peel         | 218.5                                      | 6                |

|                              |         |           |
|------------------------------|---------|-----------|
| Banana peel                  | 20.8    | 7         |
| Orange peel                  | 18.6    |           |
| Rice husk                    | 40.58   | 8         |
| Rice husk/alginate composite | 274.9   | 9         |
| Nano-silica                  | 511.04  | 10        |
| Spent coffee grounds         | 18.7    | 11        |
| SCG_ALG                      | 1601.85 | This work |

**Table S4.** Kinetic model equations and parameters.

| Model               | Non-linear equation                                                 | Parameters                                                                                                                                                                                                                                                                                                  |
|---------------------|---------------------------------------------------------------------|-------------------------------------------------------------------------------------------------------------------------------------------------------------------------------------------------------------------------------------------------------------------------------------------------------------|
| Pseudo-first-order  | $Q_t = Q_e(1 - e^{-k_1 t})$                                         | $Q_e$ : adsorption capacities at equilibrium ( $\text{mg g}^{-1}$ ); $Q_t$ : adsorption capacities at a time ( $\text{mg g}^{-1}$ ); $k_1$ : pseudo-first-order rate constant for the kinetic model ( $\text{mg g}^{-1} \text{min}^{-1}$ ); $t$ : time (min)                                                |
| Pseudo-second-order | $Q_t = \frac{k_2 Q_e^2 t}{1 + k_2 Q_e t}$<br>$h = k_2 \times Q_e^2$ | $Q_t$ : adsorption capacities at time $t$ ( $\text{mg g}^{-1}$ ); $Q_e$ : adsorption capacities at equilibrium ( $\text{mg g}^{-1}$ ); $k_2$ : pseudo-second-order rate constant of adsorption ( $\text{mg g}^{-1} \text{min}^{-1}$ ); $h$ : initial adsorption rate ( $\text{mg g}^{-1} \text{min}^{-1}$ ) |
| Elovich             | $Q_t = \frac{1}{\beta} \ln(1 + \alpha \beta t)$                     | $Q_t$ : adsorption capacities at time $t$ ( $\text{mg g}^{-1}$ ); $\alpha$ : adsorption equilibrium constant ( $\text{mg g}^{-1} \text{min}^{-1}$ ); $\beta$ :                                                                                                                                              |

|                            |                             |                                                                                                                                                                                                                                                                            |
|----------------------------|-----------------------------|----------------------------------------------------------------------------------------------------------------------------------------------------------------------------------------------------------------------------------------------------------------------------|
|                            |                             | equilibrium constant desorption (g<br>mg <sup>-1</sup> )                                                                                                                                                                                                                   |
|                            |                             | $Q_i$ : adsorption capacities at time t (mg<br>g <sup>-1</sup> ); $K_{id}$ : rate parameter of stage i (mg<br>g <sup>-1</sup> min <sup>-1/2</sup> ); $C_i$ : intercept of stage i<br>that gives an idea about of the<br>thickness of boundary layer (mg g <sup>-1</sup> ). |
| Intraparticle<br>diffusion | $Q_t = K_{id}t^{0.5} + C_i$ |                                                                                                                                                                                                                                                                            |

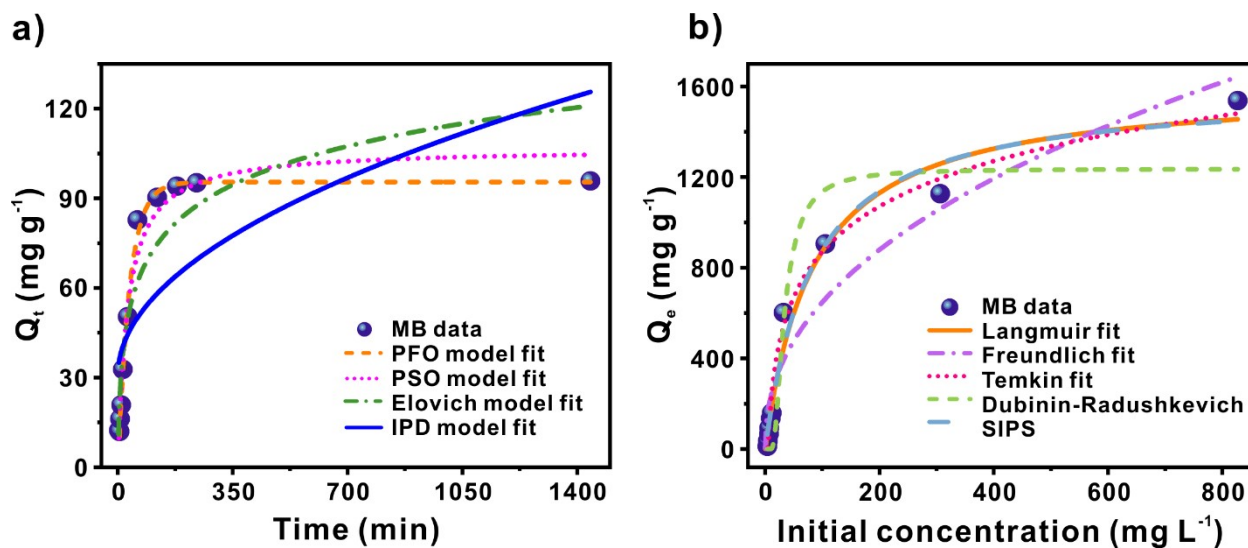

**Figure S2.** a) Kinetics fits, Pseudo-first-order (PFO); Pseudo-second-order (PSO); Elovich; and Intra-particle diffusion (IPD) ([MB]=50 mg L<sup>-1</sup>; SCG\_ALG=40 mg, volume=80 ml, time=1400 min, pH=6, room temperature), and b) isotherms fits, Langmuir, Freundlich, and Temkin model fit for MB adsorption ([MB]=10-1200 mg L<sup>-1</sup>; SCG\_ALG=10 mg, volume=20 ml, time=180 min, pH=6, room temperature).

**Table S5.** Adsorption isotherm equation and parameters.

| Model | Non-linear equation | Parameters |
|-------|---------------------|------------|
|-------|---------------------|------------|



|                      |                                                                                                                                                               |                                                                                                                                                                                                                                                                                                                                                                                                                                                                                                                                                                                                                                                                                                                 |
|----------------------|---------------------------------------------------------------------------------------------------------------------------------------------------------------|-----------------------------------------------------------------------------------------------------------------------------------------------------------------------------------------------------------------------------------------------------------------------------------------------------------------------------------------------------------------------------------------------------------------------------------------------------------------------------------------------------------------------------------------------------------------------------------------------------------------------------------------------------------------------------------------------------------------|
| Langmuir             | $Q_e = \frac{Q_m \times K_L \times C_e}{1 + K_L \times C_e}$ $R_L = \frac{1}{1 + K_L \times C_o}$ $\Delta G = -RT \ln(K_o)$ $K_o = K_L \times MM \times 10^3$ | <p><math>Q_m</math>: is maximum adsorption capacity (<math>\text{mg g}^{-1}</math>); <math>Q_e</math>: the amount of adsorbate in the adsorbent at equilibrium (<math>\text{mg g}^{-1}</math>); <math>K_L</math>: is adsorption intensity or Langmuir coefficient (<math>\text{L mg}^{-1}</math>); <math>C_e</math>: is the concentration of adsorbate at equilibrium (<math>\text{mg L}^{-1}</math>); <math>R_L</math>: is separation factor; <math>\Delta G</math>: free Gibbs energy (<math>\text{kJ mol}^{-1}</math>); <math>T</math>: temperature (K); <math>R</math>: molar gas constant (<math>\text{J K}^{-1} \text{mol}^{-1}</math>); <math>MM</math>: Molar mass (<math>\text{g mol}^{-1}</math>)</p> |
| Freundlich           | $Q_e = K_F \times C_e^{1/n}$                                                                                                                                  | <p><math>K_F</math>: is the constant indicative of the relative adsorption capacity (<math>\text{L g}^{-1}</math>); <math>n</math>: is indicative of the intensity</p>                                                                                                                                                                                                                                                                                                                                                                                                                                                                                                                                          |
| Temkin               | $Q_e = \frac{RT}{b_t} \ln(A_t \times C_e)$ $B = \frac{RT}{b_t}$                                                                                               | <p><math>A_t</math>: Temkin isotherm equilibrium binding constant (<math>\text{L g}^{-1}</math>); <math>b_t</math>: Temkin isotherm constant; <math>B</math>: Constant related to the heat of sorption (<math>\text{J mol}^{-1}</math>)</p>                                                                                                                                                                                                                                                                                                                                                                                                                                                                     |
| Dubinin-Radushkevich | $Q_e = Q_s e^{(-K_d \times \varepsilon^2)}$ $\varepsilon = RT \ln \left( 1 + \frac{1}{C_e} \right)$                                                           | <p><math>Q_s</math> is a constant in the Dubinin-Radushkevich isotherm model which are related to adsorption capacity (<math>\text{mg P g}^{-1}</math>); <math>K_d</math> is a constant in related to the mean free energy of adsorption (<math>\text{mol}^2 \text{k}^{-1} \text{J}^{-1}</math>); <math>R</math> is the</p>                                                                                                                                                                                                                                                                                                                                                                                     |

|      |                                                       |                                                                                                                                                                       |
|------|-------------------------------------------------------|-----------------------------------------------------------------------------------------------------------------------------------------------------------------------|
|      |                                                       | gas constant ( $\text{J mol}^{-1}\text{K}^{-1}$ ); and T is the<br>absolute temperature (K)                                                                           |
| Sips | $Q_e = \frac{K_s \times C_e^n}{1 + Q_s \times C_e^n}$ | $K_s$ is a SIPS isotherm model constant ( $\text{L g}^{-1}$ );<br>$n$ is the SIPS isotherm model exponent; $Q_s$ is<br>the adsorption capacity ( $\text{mg g}^{-1}$ ) |

**Table S6.** Adsorption isotherm parameters from the non-linear fitting for MB adsorption.

| Model      | Parameter                           | Material  |
|------------|-------------------------------------|-----------|
|            |                                     | SCG_ALG   |
| Freundlich | $K_F$ ( $\text{L g}^{-1}$ )         | 85.35     |
|            | $n$                                 | 2.27      |
|            | $\chi^2$                            | 25202.58  |
|            | $R^2$                               | 0.925     |
| Langmuir   | $Q_m$ ( $\text{mg g}^{-1}$ )        | 1601.85   |
|            | $K_L$ ( $\text{L mg}^{-1}$ )        | 0.012     |
|            | $R_L$                               | 0.97-0.81 |
|            | $\Delta G$ ( $\text{kJ mol}^{-1}$ ) | -20.44    |
|            | $\chi^2$                            | 7514.065  |
|            | $R^2$                               | 0.977     |
| Temkin     | $A_t$ ( $\text{L g}^{-1}$ )         | 0.20      |
|            | $b_t$                               | 8.59      |
|            | $B$ ( $\text{kJ mol}^{-1}$ )        | 0.29      |

|                      |                                 |          |
|----------------------|---------------------------------|----------|
|                      | $\chi^2$                        | 4660.67  |
|                      | $R^2$                           | 0.986    |
| Dubinin-Radushkevich | $Q_s$ ( $mg P g^{-1}$ )         | 1236.36  |
|                      | $K_d$ ( $mol^2 k^{-1} J^{-2}$ ) | 1.39E-4  |
|                      | $\chi^2$                        | 27203.67 |
|                      | $R^2$                           | 0.919    |
| SIPS                 | $Q_s$ ( $mg g^{-1}$ )           | 0.011    |
|                      | $K_s$ ( $L mg^{-1}$ )           | 17.93    |
|                      | $n$                             | 1.02     |
|                      | $\chi^2$                        | 8577.07  |
|                      | $R^2$                           | 0.977    |

**Table S7.** Thermodynamics equations and parameters.

| Parameter | Equation                                         | Parameters                                                                                                                                                                                                                                                                                   |
|-----------|--------------------------------------------------|----------------------------------------------------------------------------------------------------------------------------------------------------------------------------------------------------------------------------------------------------------------------------------------------|
| Entropy   | $\Delta S^\circ = nR$<br>$K_C = \frac{Q_e}{C_e}$ | n: intercept from a linear fit of plotting $\ln(K_c) \times T^{-1}$ ; $Q_e$ : amount of adsorbate in the adsorbent at equilibrium ( $mg g^{-1}$ ); $C_e$ : concentration of adsorbate in the equilibrium ( $mg L^{-1}$ ); T: temperature (K); R: molar gas constant ( $kJ K^{-1} mol^{-1}$ ) |
| Enthalpy  | $\Delta H^\circ = mR$                            |                                                                                                                                                                                                                                                                                              |

$$K_C = \frac{Q_e}{C_e}$$

Free energy  $\Delta G^\circ = \Delta H^\circ - (T\Delta S^\circ)$   $\Delta H^\circ$ : enthalpy (J mol<sup>-1</sup>);  $\Delta S^\circ$ : entropy (J mol<sup>-1</sup>

$$K_C = \frac{Q_e}{C_e} \quad \text{K}^{-1}$$

**Table S8.** Thermodynamic parameters for MB adsorption.

| Material | T (K) | Function                                                    |                                             |                                             | <i>R</i> <sup>2</sup> |
|----------|-------|-------------------------------------------------------------|---------------------------------------------|---------------------------------------------|-----------------------|
|          |       | $\Delta S^\circ$<br>(kJ mol <sup>-1</sup> K <sup>-1</sup> ) | $\Delta H^\circ$<br>(kJ mol <sup>-1</sup> ) | $\Delta G^\circ$<br>(kJ mol <sup>-1</sup> ) |                       |
| SCG_ALG  | 298   | -0.0396                                                     | -16.44                                      | -4.65                                       | 0.951                 |
|          | 313   |                                                             |                                             | -4.05                                       |                       |
|          | 323   |                                                             |                                             | -3.66                                       |                       |
|          | 333   |                                                             |                                             | -3.26                                       |                       |

## Section S4: X-ray photoelectron spectroscopy (XPS)

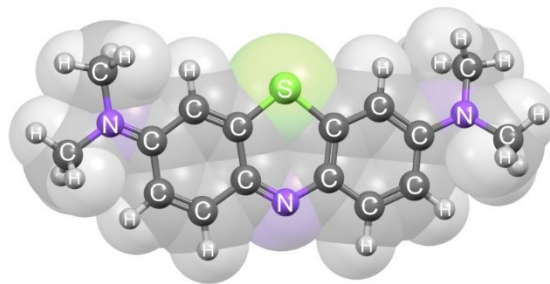

**Figure S3.** MB structure

**Table S9.** XPS survey data (atomic percentage) for the most concentrated elements in the materials.

| Samples      | Elements (At. %) |      |       |      |      |
|--------------|------------------|------|-------|------|------|
|              | C 1s             | O 1s | Ca 2p | N 1s | S 2p |
| SCG_ALG      | 84.9             | 13.8 | 0.8   | 0.4  | -    |
| SCG_ALG + MB | 88.8             | 9.8  | 0.4   | 0.9  | 0.2  |

**Table S10.** The peak-fitting results of O 1s high-resolution signal of materials.

| Samples | Assignment         | $E_B$ (eV) | FWHM (eV) | At. % |
|---------|--------------------|------------|-----------|-------|
| SCG_ALG | O1s <sub>C=O</sub> | 531.2      | 1.5       | 11.5  |
|         | O1s <sub>C-O</sub> | 532.2      | 1.6       | 48.5  |

|                     |                    |       |     |      |
|---------------------|--------------------|-------|-----|------|
|                     | <b>O1s</b> C-O-C=O | 533.5 | 1.7 | 40.0 |
| <b>SCG_ALG + MB</b> | <b>O1s</b> C=O     | 531.2 | 1.4 | 14.1 |
|                     | <b>O1s</b> C-O     | 532.4 | 1.5 | 42.9 |
|                     | <b>O1s</b> C-O-C=O | 533.7 | 1.7 | 43.0 |

**Table S11.** The peak-fitting results of C 1s high-resolution signal of materials.

| <b>Samples</b>      | <b>Assignment</b>       | <b>E<sub>B</sub> (eV)</b> | <b>FWHM (eV)</b> | <b>At. %</b> |
|---------------------|-------------------------|---------------------------|------------------|--------------|
| <b>SCG_ALG</b>      | <b>C1s</b> C=C aromatic | 284.4                     | 1.2              | 21.9         |
|                     | <b>C1s</b> C-C, C-CH    | 285.0                     | 1.2              | 51.4         |
|                     | <b>C1s</b> C-N/C-O      | 286.4                     | 1.4              | 17.1         |
|                     | <b>C1s</b> C=O          | 288.5                     | 1.7              | 9.6          |
| <b>SCG_ALG + MB</b> | <b>C1s</b> C=C aromatic | 283.9                     | 1.4              | 10.3         |
|                     | <b>C1s</b> C-C, C-CH    | 285.0                     | 1.5              | 67.2         |
|                     | <b>C1s</b> C-N/C-O      | 286.6                     | 1.6              | 14.4         |
|                     | <b>C1s</b> C=O          | 288.7                     | 1.8              | 8.1          |

**Table S12.** The peak-fitting results of Ca 2p<sub>3/2</sub> high-resolution signal of materials.

| <b>Samples</b> | <b>Assignment</b>                 | <b>E<sub>B</sub> (eV)</b> | <b>FWHM (eV)</b> | <b>At. %</b> |
|----------------|-----------------------------------|---------------------------|------------------|--------------|
| <b>SCG_ALG</b> | <b>Ca 2p<sub>3/2</sub></b> Ca(II) | 347.5                     | 1.7              | 100          |

|                     |                                   |       |     |     |
|---------------------|-----------------------------------|-------|-----|-----|
| <b>SCG_ALG + MB</b> | <b>Ca 2p<sub>3/2</sub> Ca(II)</b> | 347.4 | 1.7 | 100 |
|---------------------|-----------------------------------|-------|-----|-----|

**Table S13.** The peak-fitting results of N 1s high-resolution signal of materials.

| <b>Samples</b>      | <b>Assignment</b>                           | <b>E<sub>B</sub> (eV)</b> | <b>FWHM (eV)</b> | <b>At. %</b> |
|---------------------|---------------------------------------------|---------------------------|------------------|--------------|
| <b>SCG_ALG + MB</b> | N 1s <sub>R-N=R</sub> (R: aromatic), Iminic | 398.4                     | 1.6              | 23.7         |
|                     | N 1s <sub>Amine</sub>                       | 399.9                     | 1.8              | 76.3         |

**Table S14.** The peak-fitting results of S 2p<sub>3/2</sub> high-resolution signal of materials.

| <b>Samples</b>      | <b>Assignment</b>               | <b>E<sub>B</sub> (eV)</b> | <b>FWHM (eV)</b> | <b>At. %</b> |
|---------------------|---------------------------------|---------------------------|------------------|--------------|
| <b>SCG_ALG + MB</b> | <b>S 2p<sub>3/2</sub> C-S=C</b> | 163.7                     | 1.7              | 100          |

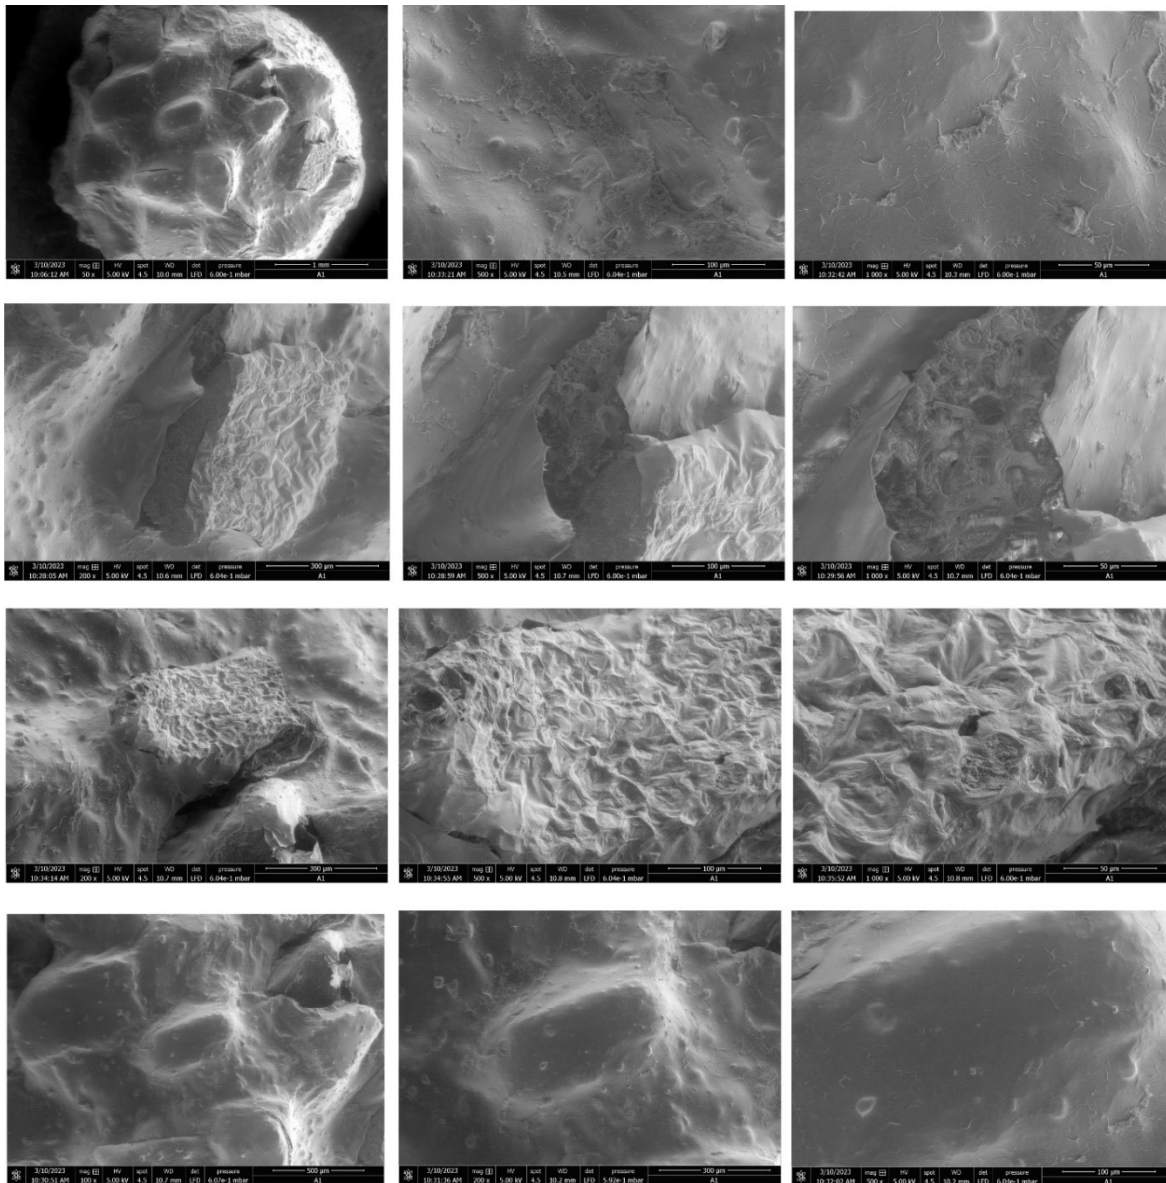

**Figure S4.** SEM micrographs of SCG\_ALG before MB adsorption.



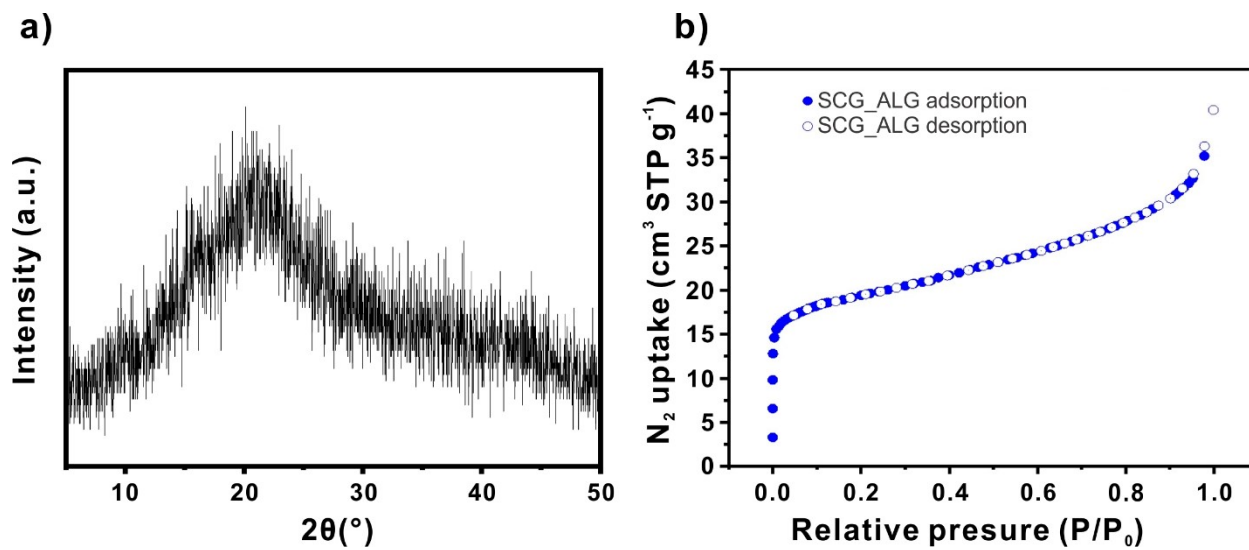

Figure S5. a)PXRD and b)  $N_2$  adsorption of SCG\_ALG.

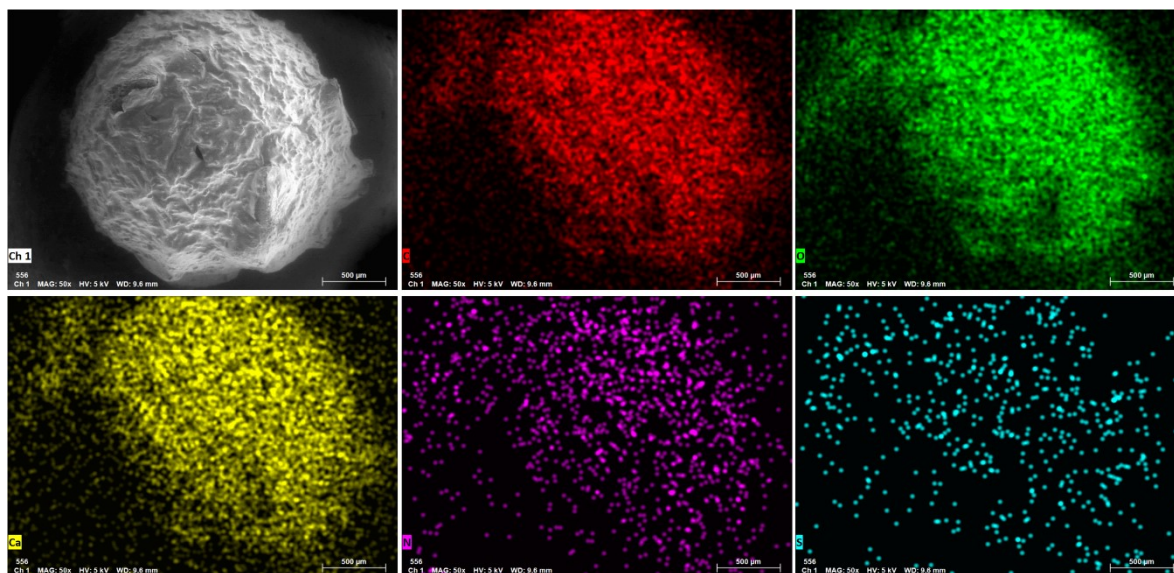

Figure S6. SEM micrograph and mapping of SCG\_ALG after MB adsorption.

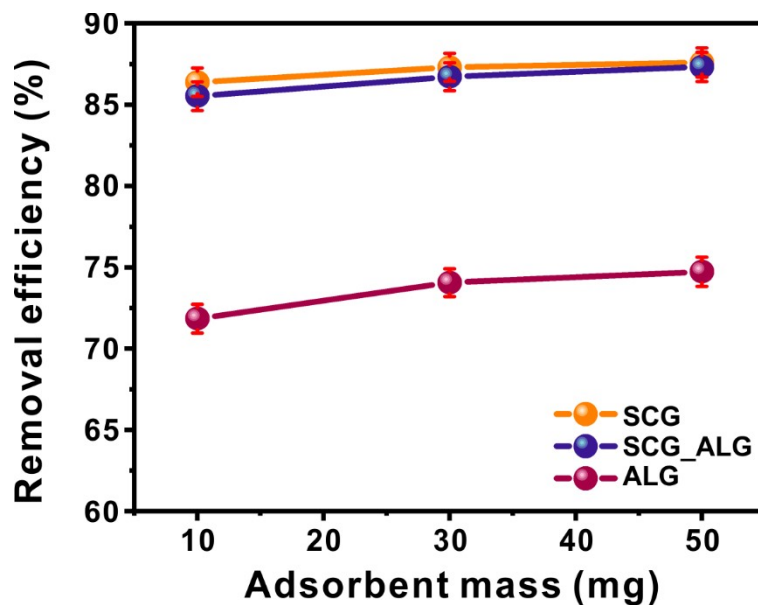

**Figure S7.** Control experiment of adsorbent mass influence with spent coffee grounds (SCG), SCG\_ALG and alginate beads (ALG) over removal efficiency of MB adsorption.

## References

- 1 V. BASAVARAO and S. RAMMOHANRAO, *Chemical Engineering Journal*, 2006, **116**, 77–84.
- 2 B. Royer, N. F. Cardoso, E. C. Lima, J. C. P. Vaghetti, N. M. Simon, T. Calvete and R. C. Veses, *J Hazard Mater*, 2009, **164**, 1213–1222.
- 3 Z. Jia, Z. Li, S. Li, Y. Li and R. Zhu, *J Mol Liq*, 2016, **220**, 56–62.
- 4 K. Rida, S. Bouraoui and S. Hadnine, *Appl Clay Sci*, 2013, **83–84**, 99–105.
- 5 D. Özer, G. Dursun and A. Özer, *J Hazard Mater*, 2007, **144**, 171–179.
- 6 V.-P. Dinh, T.-D.-T. Huynh, H. M. Le, V.-D. Nguyen, V.-A. Dao, N. Q. Hung, L. A. Tuyen, S. Lee, J. Yi, T. D. Nguyen and L. V. Tan, *RSC Adv*, 2019, **9**, 25847–25860.
- 7 G. ANNADURAI, R. JUANG and D. LEE, *J Hazard Mater*, 2002, **92**, 263–274.
- 8 V. Vadivelan and K. V. Kumar, *J Colloid Interface Sci*, 2005, **286**, 90–100.
- 9 E. Alver, A. Ü. Metin and F. Brouers, *Int J Biol Macromol*, 2020, **154**, 104–113.

- 10 Z. Li, L. Sellaoui, S. Gueddida, G. L. Dotto, A. Ben Lamine, A. Bonilla-Petriciolet and M. Badawi, *J Mol Liq*, 2020, **319**, 114348.
- 11 A. S. Franca, L. S. Oliveira and M. E. Ferreira, *Desalination*, 2009, **249**, 267–272.
